# Supplementary material for: An aqueous two-phase system formed in single-component solution of α-ketooctanoic acid
Source: Royal Society of Chemistry journal article supplement (doi:10.1039/d1ra06474f), 2021-01-01
Supplement: d1ra06474f1.pdf [file d1ra06474f1.pdf]

## Electronic Supplementary Information

### An aqueous two-phase system formed in single-component solution of $\alpha$ -ketoctanoic acid

Huifang Xu,<sup>a</sup> Xin Liang,<sup>a</sup> Yaping Zhang,<sup>a</sup> Meihua Gao,<sup>b</sup> Na Du,<sup>b</sup> Wanguo Hou\*<sup>b</sup>

<sup>a</sup> College of Pharmacy, Henan University of Chinese Medicine, Zhengzhou 450046, P. R. China

<sup>b</sup> Key Laboratory of Colloid and Interface Chemistry (Ministry of Education), Shandong University, Jinan 250100, P. R. China

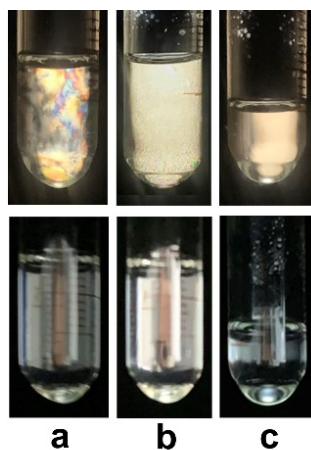

**Fig. S1.** Photographs of KOCOOH solutions at (a) 500, (b) 750, (c) 1000 mM, with (up) and without (below) crossed polarizers.

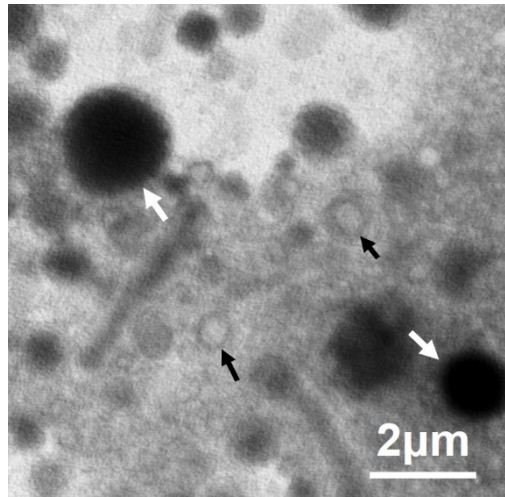

**Fig. S2.** NS-TEM image of KOCOOH solution with 50 mM. Vesicles and oil droplets, as indicated by black and white arrows, respectively, coexist in the system.

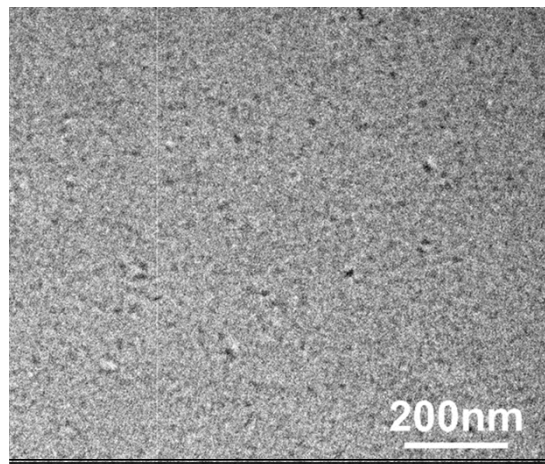

**Fig. S3.** Cryo-TEM image of the upper phase of ATPS with 130 mM.

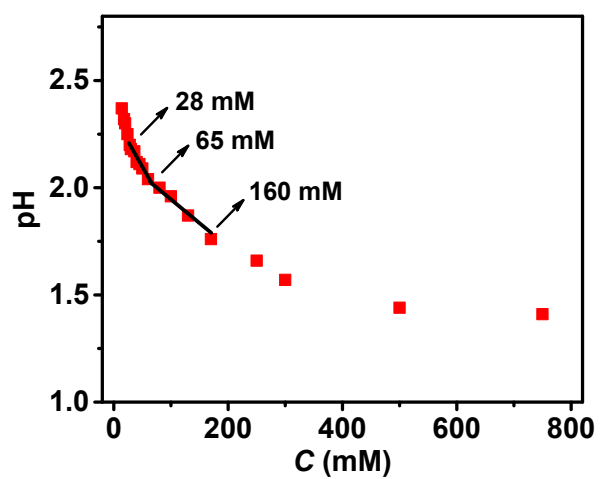

**Fig. S4.** Change of pH of KOCOOH solution with its concentration at 25 °C.
